# Supplementary material for: Effects of statin on circulating microRNAome and predicted function regulatory network in patients with unstable angina
Source: PubMed Central journal article supplement (PMC4364658; doi:10.1186/s12920-015-0082-4), 2015-03-13
Supplement: 12920_2015_82_MOESM3_ESM.pdf [file 12920_2015_82_MOESM3_ESM.pdf]

|                 | blood           | monocyte     | macrophage    | platelet     | endothelial cell |
|-----------------|-----------------|--------------|---------------|--------------|------------------|
| hsa-miR-191     | hsa-miR-191     |              | hsa-miR-191   |              |                  |
| hsa-miR-92a     | hsa-miR-92a     | hsa-miR-92a  | hsa-miR-92a   |              |                  |
| hsa-miR-532-3p  | hsa-miR-532-3p  |              |               |              |                  |
| hsa-miR-574-3p  |                 |              |               |              |                  |
| hsa-miR-30b     | hsa-miR-30b     |              | hsa-miR-30b   | hsa-miR-30b  |                  |
| hsa-miR-486-5p  | hsa-miR-486-5p  |              |               |              |                  |
| hsa-miR-223     | hsa-miR-223     | hsa-miR-223  | hsa-miR-223   | hsa-miR-223  | hsa-mir-223      |
| hsa-miR-30c     | hsa-miR-30c     | hsa-miR-30c  |               | hsa-miR-30c  |                  |
| hsa-miR-484     |                 |              |               |              |                  |
| hsa-miR-451     | hsa-miR-451     | hsa-miR-451  | hsa-miR-451   | hsa-miR-451  |                  |
| hsa-miR-331-3p  | hsa-miR-331-3p  |              |               |              |                  |
| hsa-miR-25      | hsa-miR-25      |              |               |              |                  |
| hsa-miR-222     | hsa-miR-222     | hsa-miR-222  | hsa-miR-222   |              | hsa-mir-222      |
| hsa-miR-652     |                 |              |               |              |                  |
| hsa-miR-19b     | hsa-miR-19b     | hsa-miR-19b  |               |              |                  |
| hsa-miR-15b     | hsa-miR-15b     | hsa-miR-15b  | hsa-miR-15b   | hsa-miR-15b  | hsa-mir-15b      |
| hsa-miR-140-3p  | hsa-miR-140-3p  |              |               |              |                  |
| hsa-miR-26a     | hsa-miR-26a     | hsa-miR-26a  | hsa-miR-26a   |              |                  |
| hsa-miR-324-3p  |                 |              |               |              |                  |
| hsa-miR-150     | hsa-miR-150     | hsa-miR-150  | hsa-miR-150   | hsa-miR-150  | hsa-mir-150      |
| hsa-miR-93      | hsa-miR-93      |              | hsa-miR-93    |              | hsa-mir-93       |
| hsa-miR-106a    | hsa-miR-106a    | hsa-miR-106a | hsa-miR-106a  |              | hsa-mir-106a     |
| hsa-miR-21      | hsa-miR-21      | hsa-miR-21   | hsa-miR-21    |              | hsa-miR-21       |
| hsa-miR-17      | hsa-miR-17      |              | hsa-miR-17    | hsa-miR-17   | hsa-miR-17       |
| hsa-miR-320     |                 |              |               |              |                  |
| hsa-miR-24      | hsa-miR-24      | hsa-miR-24   | hsa-miR-24    | hsa-miR-24   | hsa-miR-24       |
| hsa-miR-146b-5p | hsa-miR-146b-5p | hsa-miR-146b | hsa-miR-146b  | hsa-miR-146b | hsa-miR-146b     |
| hsa-miR-142-3p  | hsa-miR-142-3p  | hsa-miR-142  | hsa-miR-142-3 | hsa-miR-142  | hsa-miR-142      |
| hsa-miR-19a     | hsa-miR-19a     |              |               |              | hsa-miR-19a      |
| hsa-miR-30a-5p  |                 |              |               |              |                  |
| hsa-miR-126     | hsa-miR-126     | hsa-miR-126  | hsa-miR-126   | hsa-miR-126  | hsa-miR-126      |
| hsa-miR-197     | hsa-miR-197     |              |               | hsa-miR-197  |                  |
| hsa-miR-20a     | hsa-miR-20a     | hsa-miR-20a  | hsa-miR-20a   |              | hsa-miR-20a      |
| hsa-miR-29a     | hsa-miR-29a     |              |               |              |                  |
| hsa-miR-146a    | hsa-miR-146a    | hsa-miR-146a | hsa-miR-146a  | hsa-miR-146a | hsa-miR-146a     |
| hsa-miR-222     | hsa-miR-222     | hsa-miR-222  | hsa-miR-222   |              | hsa-mir-222      |
| hsa-miR-223     | hsa-miR-223     | hsa-miR-223  | hsa-miR-223   | hsa-miR-223  | hsa-mir-223      |
| hsa-miR-19b     | hsa-miR-19b     | hsa-miR-19b  |               |              |                  |
| hsa-miR-92a     | hsa-miR-92a     | hsa-miR-92a  | hsa-miR-92a   |              |                  |
| hsa-miR-451     | hsa-miR-451     | hsa-miR-451  | hsa-miR-451   | hsa-miR-451  |                  |
| hsa-miR-106a    | hsa-miR-106a    | hsa-miR-106a | hsa-miR-106a  |              | hsa-mir-106a     |

---

---

---

-5p  
3p

---
